# Supplementary material for: Multifidelity Multiobjective Optimization for Wake Steering Strategies
Source: Copernicus journal article supplement (doi:10.5194/wes-2021-152), 2022-01-18
Supplement: Supplementary file [file wes-2021-152-AC2-supplement.pdf]

## Response to Referee 2

We greatly appreciate the time taken by the referee to read our manuscript. We have taken into consideration and addressed all comments, questions, and suggestions from the reviewer, and we feel that the revised manuscript is now substantially stronger as a result. Changes made to the text at the request of the reviewer have been highlighted in red in the revised manuscript. In the following, reviewer comments are repeated in italics and our responses are provided in the bulleted sections of text.

### *Major Comments*

1) *Even a slight change in the downwind turbine location is likely to substantially change the Pareto set results. I am especially looking at the results in Section 4.2 Flow Physics Insights. It seems from Figure 6 that negative yaw misalignment underperforms positive yaw only because of a very slight overlap between the curled wake shape and the lower half of the downwind rotor. I expect small changes in the ABL shear, stability, etc. would also change the results. It would be helpful to more clearly highlight throughout the manuscript that your results are specific to ABL properties and the turbine layout considered in your test case*

- We thank the reviewer for this comment and agree that this caveat could have been clearer in the text. We now clarify that the presented results are specific to the specified atmospheric conditions on P17L368 and P17L379. We have also added text on P18L393 to highlight that uncertainty in atmospheric conditions or yaw positions can substantially impact the results of this analysis.

2) *How does this methodology scale to higher dimensional input spaces (i.e. more than two values of control inputs)? – A discussion of the scaling and potential challenges that it brings would be useful to understand how this concept may perform in more realistic scenarios. Especially since this Pareto set would be unique to the wind farm layout, ABL conditions, etc (Point 1). So I expect that the Pareto set would need to be uniquely computed over these independent variable input combinations (curse of dimensionality)?*

- This is an important point and we have modified P5L136 to note that the cost of optimization of the EHVI generally grows exponentially with the number of inputs. We also now note on P5L137-139 that performing the EHVI optimization using a grid search would become computationally prohibitive for higher dimensional design inputs.

3) *I am wondering about two forms of uncertainty not discussed in the manuscript:*

a. *Sampling uncertainty - all results are taken from CFD with finite-time averages. Does this impact your results? Relatedly, are all CFD cases started from identical initial conditions? Are your Pareto sets robust to sampling uncertainty?*

b. *Meta-uncertainty - How does the meta-uncertainty over different random seeds for your initial sampling points and your initial conditions affect the output Pareto set?*

- We agree that uncertainty is an important consideration and we have added text in the conclusions on P18L393 noting that uncertainty will alter the shape of the Pareto set. To address the sampling uncertainty, we have added text on P9L221-223 explaining that we validated the time intervals used in the analysis by comparing results after 600-900 s and results after 900-1,200 s, finding a 2.6% relative difference between the computed powers and 4.2% relative difference between the computed DELs. We have also added text on P8L199-200 to clarify that all simulations were started with the same initial conditions. With respect to

the meta-uncertainty, we agree that a random sampling approach with different initial seeds would be useful. As we now note on P12L312-314, we performed several shorter optimizations as part of the development process using different random initial seeds to confirm that the multifidelity approach consistently outperformed the single fidelity approach.

4) *The refined sampling points shown in Figure 5 are helpful, but further validation of the proposed methodology’s ability to capture the Pareto front would be useful. Can the authors refine their grid search over the  $\gamma_1$  and  $\gamma_2$  space?*

- We agree that a more refined grid search could be used to further refine the Pareto front. However, our use of the grid search in the present study was intended primarily as a demonstration that, after performing the multifidelity multiobjective optimization to determine several points in the Pareto front, the front can be further refined using a targeted grid search. Given this primary objective, which we now state more clearly in the revised paper on P13L321-323, we hope the reviewer agrees that the presented refinement points are sufficient to confirm the validity of the proposed method.

### **Detailed Comments**

1) *Line 5: What is meant by “unsteady LES.” Is there a time-dependent boundary condition or just turbulent variations about a mean state?*

- We agree that this was a confusing choice of words and we removed the term “unsteady.” The boundary conditions are not time-dependant.

2) *Line 19: “A counter-rotating pair of vortices is generated by the rotating blades”. The counter-rotating pair is also shed by non-rotating turbine models [1,2], so perhaps it is unclear to say that the counter-rotating pair of vortices is generated by ‘the rotating blades’, but rather ‘the yawed rotor’. The rotating blades do also affect the dynamics of the counter-rotating vortex pair [1].*

- This point was indeed potentially confusing and we have changed the language in the introduction on P1L19-21 to read: “A counter-rotating pair of vortices is generated by the lateral thrust of the wind turbine rotor, which is determined by the yaw offset direction.”

3) *Line 28: “Damiani et al. (2018) performed a detailed analysis of a single wind turbine, noting that negative yaw offsets tended to increase fatigue loading more than positive yaw offsets.” The primary conclusions of Damiani et al. (2018) are that the loading depends on the site conditions (e.g. shear) and turbine model. From the referenced paper conclusions: “On average, the blade-root bending moment DEL decreased for positive yaw offsets and increased for negative offsets. Fairly large variations can be attributed to different turbulence seeds and data records, making generalization more difficult.” It is worth providing that context in your statement, since the result of negative yaw leading to more fatigue than positive yaw will not always hold.*

- This is a useful caveat to include and we added text on P2L28-29 stating that these conclusions were specific to the turbulence seeds used in the study.

4) *Line 36: “While engineering wake models are remarkably accurate in power prediction [...]” I am not sure the subjective descriptor “remarkably accurate” is useful or true. What level of accuracy is remarkable? Wake models exhibit predictive error in many applications.*

- We now clarify on P2L38 that it is Figures 6-11 in the cited work that show remarkable agreement between low- and high-fidelity models when predicting power, with poorer agreement when predicting loading.

5) *Line 63: Here you state that the objective is always minimization in this section (Section 2) but subsections 2.1 and 2.2 use maximization objectives.*

- We agree that it was somewhat jarring to switch from minimization to maximization and we have altered the definition of  $J$  in Section 2.2 to call for the minimization of  $J$ . Since the definition of the  $EHVI$  is an intermediate step, we have kept the note that the  $EHVI$  should be maximized.

6) *Equation 1: What is the dimensionality of  $\gamma$ ? Is it of size = number of turbines?*

- We have added text on P3L68 to explicitly define the dimension of  $\gamma$  to be the number of turbines considered.

7) *Line 66: Here  $f_i$  is not defined, is that intentional? I was not sure if is emulating  $g_i(\gamma)$  directly or is related to  $f_i$  somehow through an objective function?*

- We have altered the text to clarify that  $f_i$  are the simulated power and loading, making it clearer that  $g_i$  are emulating  $f_i$ .

8) *Line 73: Related to the note above, on this line,  $f_i(\gamma)$  is referred to as an “output” instead of an “objective function.” This confusion comes up a few times later in the paper so it is worth clarifying explicitly here.*

- To avoid confusion, we have altered introduction of Section 2 to avoid referring to  $f_i$  as objectives, and instead refer to them as simulated outputs.

9) *Equation 4: It would be useful to add a validation of the GP model used.*

- We have added a note to P3L73-74 that scikit-learn library (Pedregosa et al., 2011) is a well-validated open-source library where the Gaussian Process code has been extensively validated.

10) *Equation 9: Define Pareto dominance*

- We have added a reference to a text on P5L118 that gives a comprehensive definition of Pareto dominance.

11) *Equation 12:  $r_1$  and  $r_2$  and are not defined, I assume they are the coordinates of the reference point in two dimensional space?*

- We agree that this definition could have been made clearer and we now clarify that  $r_1$  and  $r_2$  are coordinates of the reference point on P5L130.

12) *Section 2.2: The difference between  $N$  and  $l$  isn't clear in this section*

- We have changed Equation 18 to use the symbol  $i$  instead of  $l$ , to remain consistent with the notation introduced in the preceding paragraphs of Section 2.2.

13) *Line 155: “No matter which fidelity is to be sampled next, the ultimate goal is to minimize the highest-fidelity function, [...]” This is confusing. Here you mean the goal is to minimize the highest fidelity function meaning  $f$ ? But to do that you maximize the objective function  $J$  ( $f$  also being a different objective function).*

- We agree that there is some potential for confusion caused by this wording. We have thus changed the sentence to pluralize the references to functions being minimized. We also now refer to  $J$  as the multiobjective *acquisition function* instead of as an optimization objective.

14) *Equation 18: So there is a different objective  $J$  for each model fidelity? That is not clear in this section if so. Also, it is a little confusing to have both  $J$  and  $f$  as objective functions.*

- We now clarify on P6L168 that there is a single  $J$  objective that is a function of the model fidelity.

15) *Line 180: Is the turbine nacelle or tower included? This has been noted to affect CVP dynamics [3] so what the authors are using should be stated.*

- We clarify on P8L196-197 that only the turbine blades were represented, and the analysis neglects the presence of the tower and nacelle.

16) *Figure 1:*

a. *The comparative step between the high and low fidelity objectives in the workflow is not explained in the text.*

b. *LF and HR (presumably high and low fidelity) not defined.*

- We have added text preceding Figure 1 on P7L175-180 explaining that the comparative step is linked to the multiobjective acquisition function. We also now better connect the notation in the figure to the notation in the paper.

17) *Figure 2: The ‘low-fidelity model’ looks like it has unphysical grid-to-grid oscillations in the output. How do these unphysical CFD errors impact your results?*

- These oscillations are indeed important and we now clarify on P12L297-300 and P17L372-373 that the oscillations in the model lead to similar oscillations in the moment signals, causing the need for the different low-fidelity loading model.

18) *Line 226: I am puzzled by the authors’ choice of normalization to have the objectives be in the same order of magnitude. The choice seems ad hoc. Why not use a more precise transformation to ensure they are more directly comparable (e.g. standardization transform). A multiobjective objective function composed of two different units (MW and Nm) seems strange.*

- We have added text on P10L262-263, explaining that the normalization constants were chosen based on the initial sampling results to get the power and loading to be on a similar scale, and that 10 was subtracted to ensure that the loading objective was negative.

19) *Line 241: Why will random sampling ‘drastically affect the optimization.’ What do you mean by “drastically”? The authors could (perhaps should) account for meta-uncertainty by testing the results over several initialization realizations.*

- We have removed the word “drastically” from the text to avoid confusion since, as noted in our response to major comment 3, we have added text on P12L312-314 highlighting the invariance of the conclusions in the paper to different initializations.

20) *Line 243: Missing degree symbol*

- We thank the reviewer for pointing this out. The degree symbol has been added.

21) *Section 3.3.2 should be mentioned earlier, perhaps in an outline introduction to Section 3. It was confusing as written. Several questions came to mind: a. How did the authors specify that 0.89 correlation is sufficiently high while 0.74 (correlation between HF DEL and LF DEL) is not? b. Does this correlation depend on the yaw misalignment? In the introduction, the authors stated that the bending moments depend on yaw. c. I anticipate that this will depend on the inflow conditions as well, so I am wondering how this method could be used in practice.*

- We thank the reviewer for raising these issues. We have added a short introduction to Section 3 on P7L182-185, outlining the contents of the section. In response to point a, we did indeed first attempt the optimization without the modified low-fidelity loading function. When we noticed the single-fidelity approach was outperforming the multifidelity approach, we changed the low-fidelity loading model to favor the form with the larger correlation. We added this text on P11L286-288. In response to point b, the presented correlations are with respect to uniform distributions of potential yaw offsets. From this definition, the correlation cannot depend on a specific set of yaw offsets. Finally, in response to point c, we explain in the introduction on P2L40-41 that “In practice, power and loading will likely be optimized in real time using a singular weighted objective.”

22) *Section 3.3.2: I am wondering what these results suggest about the approach of ‘low-fidelity loads modeling.’ It would be helpful to more clearly discuss why the low-fidelity model fails to capture the fatigue. Is the turbulence in the low-fidelity model insufficiently resolved such that it misses the effect of turbulence on the loading?*

- We agree that this is an interesting point that could have been better explained. We now explain on P12L297-300 and P17L372-373 that the lower-order moment functions avoid the influence of the spurious oscillations caused by the low-fidelity loading model.

23) *Equation 28: Is the DEL function missing here? In Equation 27,  $L = DEL(M)$ , not just  $M$ .*

- We have clarified on P12L297-300 that the DEL is purposefully replaced with the lower-order moment functions to avoid the influence of the spurious oscillations caused by the low-fidelity loading model.

24) *Figure 7: a. This figure is very small, please increase the size b. I found it to be confusing that the wake deficit increase from  $x/D=6$  to  $x/D=8$ , but that is because the downwind turbine is at  $x/D=7$ . That should be made more clear in the figure. I am not sure what I am supposed to learn from the  $x/D=8$  contours.*

- We have enlarged the figure and omitted the  $X/D=9$  plots to save space. We also clarify in the figure caption that the downstream turbine is located at  $X/D=7$ .

25) *Figure 8: Likewise, this figure is small and has many lines. Hard to see.*

- We have enlarged the size of Figure 8 to make it easier to read.

26) *Line 334: “A positive front turbine yaw offset is more effective at reducing loading and increasing power than a negative yaw offset because the counter-rotating vortices produce a greater velocity deficit in the downstream wake.” I believe this sentence needs to be re-phrased. The authors meant to say that positive yaw leads to less velocity deficit in the wake region (at least the wake region where the downwind turbine is located).*

- We now clarify that the greater velocity deficit is associated with the former strategy (i.e., the negative yaw offset) on P17L381.

## References

[1] Howland, Michael F., Juliaan Bossuyt, Luis A. Martínez-Tossas, Johan Meyers, and Charles Meneveau. “Wake structure in actuator disk models of wind turbines in yaw under uniform inflow conditions.” *Journal of Renewable and Sustainable Energy* 8, no. 4 (2016): 043301.

[2] Shapiro, Carl R., Dennice F. Gayme, and Charles Meneveau. "Modelling yawed wind turbine wakes: a lifting line approach." *Journal of Fluid Mechanics* 841 (2018).

[3] Zong, Haohua, and Fernando Porté-Agel. "A point vortex transportation model for yawed wind turbine wakes." *Journal of Fluid Mechanics* 890 (2020).

We thank the reviewer for these useful comments, and the paper has now been revised in order to address all of the above points. Sincerely, the authors.
